# Supplementary material
Source: PubMed Central journal article supplement (PMC6677239)
Supplement: NIHMS1026504-supplement-Figure_S1.pdf [file NIHMS1026504-supplement-Figure_S1.pdf]

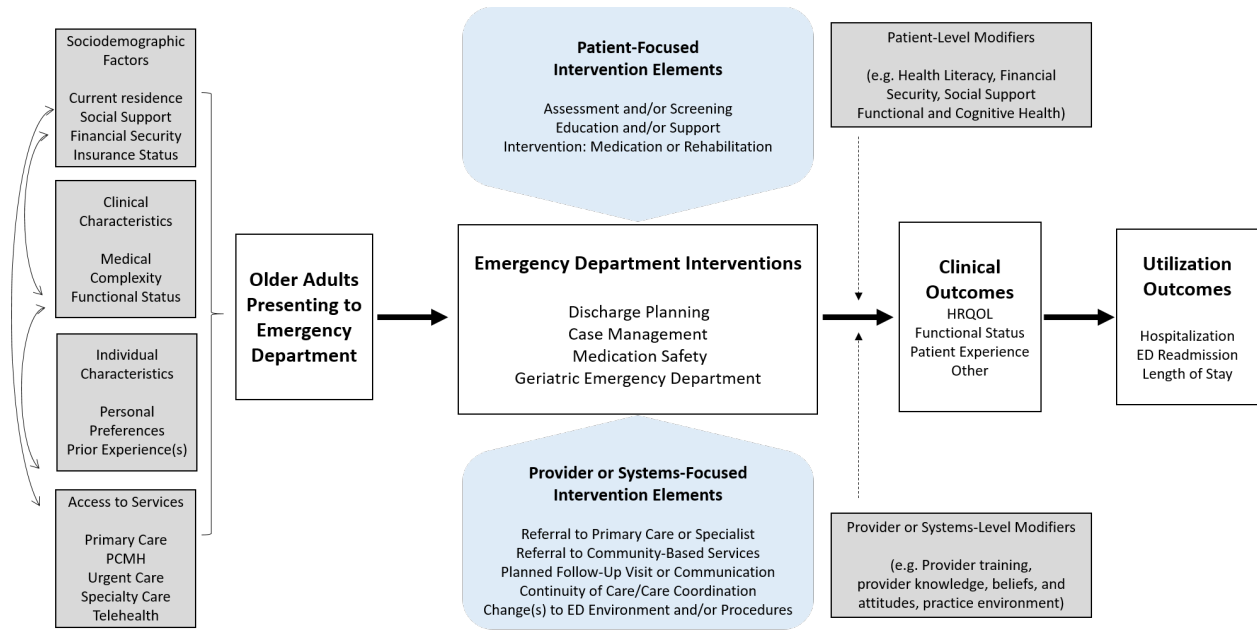

Abbreviations: ED=emergency department; Geri=geriatric; HRQOL=health-related quality of life; PCMH=patient-centered medical home
