# Supplementary material
Source: PubMed Central journal article supplement (PMC6677239)
Supplement: NIHMS1026504-supplement-Figure_S2.pdf [file NIHMS1026504-supplement-Figure_S2.pdf]

|               | Random sequence generation (selection bias) | Allocation concealment (selection bias) | Were baseline OUTCOME measurements similar | Were baseline PROVIDER characteristics similar | Blinding of outcome assessment (detection bias-objective outcome) | Blinding of outcome assessment (detection bias-patient-reported outcome) | Incomplete outcome data (attrition bias) | Protection Against Contamination | Selective reporting (reporting bias) | Other bias | Overall-objective outcome | Overall-patient-reported outcome |
|---------------|---------------------------------------------|-----------------------------------------|--------------------------------------------|------------------------------------------------|-------------------------------------------------------------------|--------------------------------------------------------------------------|------------------------------------------|----------------------------------|--------------------------------------|------------|---------------------------|----------------------------------|
| Basic,2005    | +                                           | +                                       | -                                          | ?                                              | +                                                                 | -                                                                        | -                                        | +                                | +                                    | +          | -                         | -                                |
| Biese,2014    | ?                                           | -                                       | ?                                          | -                                              | +                                                                 | -                                                                        | -                                        | ?                                | +                                    | -          | -                         | -                                |
| Biese,2017    | +                                           | +                                       | ?                                          | ?                                              | +                                                                 | -                                                                        | +                                        | ?                                | +                                    | ?          | ?                         | -                                |
| Caplan,2004   | +                                           | +                                       | +                                          | ?                                              | +                                                                 | -                                                                        | +                                        | +                                | +                                    | +          | +                         | ?                                |
| Eklund,2013   | ?                                           | +                                       | +                                          | ?                                              |                                                                   | -                                                                        | +                                        | ?                                | +                                    | +          |                           | -                                |
| Gagnon,1999   | +                                           | +                                       | +                                          |                                                | +                                                                 | ?                                                                        | +                                        | -                                | +                                    | ?          | ?                         | ?                                |
| McCusker,2001 | +                                           | +                                       | +                                          | ?                                              | +                                                                 | +                                                                        | +                                        | +                                | +                                    | ?          | +                         | +                                |
| Mion,2003     | +                                           | +                                       | +                                          | ?                                              | +                                                                 | +                                                                        | +                                        | +                                | +                                    | +          | +                         | +                                |
| Runciman,1996 | ?                                           | ?                                       | -                                          | ?                                              | ?                                                                 | ?                                                                        | ?                                        | +                                | +                                    | +          | ?                         | ?                                |

White indicates items that were not applicable. Green/positive indicates items that were judged low ROB. Yellow/question mark indicates items that were judged unclear ROB. Red/negative indicates items that were judged high ROB.
