# Supplementary material
Source: PubMed Central journal article supplement (PMC6677239)
Supplement: NIHMS1026504-supplement-Figure_S3.pdf [file NIHMS1026504-supplement-Figure_S3.pdf]

|               | Random sequence generation (selection bias) | Allocation concealment (selection bias) | Were baseline OUTCOME measurements similar | Were baseline PROVIDER characteristics similar | Blinding of outcome assessment (detection bias-objective outcome) | Blinding of outcome assessment (detection bias-patient-reported outcome) | Incomplete outcome data (attrition bias) | Protection Against Contamination | Selective reporting (reporting bias) | Other bias | Overall-objective outcome | Overall-patient-reported outcome |
|---------------|---------------------------------------------|-----------------------------------------|--------------------------------------------|------------------------------------------------|-------------------------------------------------------------------|--------------------------------------------------------------------------|------------------------------------------|----------------------------------|--------------------------------------|------------|---------------------------|----------------------------------|
| Arendts,2012  | Red (-)                                     | Red (-)                                 | Green (+)                                  | Yellow (?)                                     | Green (+)                                                         | White                                                                    | Green (+)                                | Green (+)                        | Green (+)                            | Green (+)  | Red (-)                   | White                            |
| Arendts,2013  | Red (-)                                     | Red (-)                                 | Yellow (?)                                 | Yellow (?)                                     | Green (+)                                                         | White                                                                    | Green (+)                                | Green (+)                        | Green (+)                            | Red (-)    | Red (-)                   | White                            |
| Bond,2014     | Red (-)                                     | Green (+)                               | Yellow (?)                                 | Yellow (?)                                     | Green (+)                                                         | White                                                                    | Green (+)                                | Green (+)                        | Green (+)                            | Green (+)  | Red (-)                   | White                            |
| Miller,1996   | Red (-)                                     | Red (-)                                 | Yellow (?)                                 | White                                          | Green (+)                                                         | Red (-)                                                                  | Red (-)                                  | Green (+)                        | Green (+)                            | Red (-)    | Red (-)                   | Red (-)                          |
| Mortimer,2011 | Red (-)                                     | Red (-)                                 | Yellow (?)                                 | Yellow (?)                                     | Green (+)                                                         | Red (-)                                                                  | Green (+)                                | Red (-)                          | Green (+)                            | Green (+)  | Red (-)                   | Red (-)                          |
| Pedersen,2016 | Green (+)                                   | Green (+)                               | Green (+)                                  | Yellow (?)                                     | Green (+)                                                         | White                                                                    | Green (+)                                | Green (+)                        | Green (+)                            | Green (+)  | Green (+)                 | White                            |

White indicates items that were not applicable. Green/positive indicates items that were judged low ROB. Yellow/question mark indicates items that were judged unclear ROB. Red/negative indicates items that were judged high ROB.
