# Supplementary material
Source: PubMed Central journal article supplement (PMC6677239)
Supplement: NIHMS1026504-supplement-Table_1.pdf [file NIHMS1026504-supplement-Table_1.pdf]

## Supplemental Table 1. Search strategy

Search date: December 4, 2017

|    |                                                                                                                                                                                                                                                                                                                                                                                                                                                                                                                                                                                                                                                                                                                                                                                                                                                                                                                                                                                                                                                                                                                                                                                                                                                                                                                                                                                                                                                                                                                                                                                                                                                                                                                                          |           |
|----|------------------------------------------------------------------------------------------------------------------------------------------------------------------------------------------------------------------------------------------------------------------------------------------------------------------------------------------------------------------------------------------------------------------------------------------------------------------------------------------------------------------------------------------------------------------------------------------------------------------------------------------------------------------------------------------------------------------------------------------------------------------------------------------------------------------------------------------------------------------------------------------------------------------------------------------------------------------------------------------------------------------------------------------------------------------------------------------------------------------------------------------------------------------------------------------------------------------------------------------------------------------------------------------------------------------------------------------------------------------------------------------------------------------------------------------------------------------------------------------------------------------------------------------------------------------------------------------------------------------------------------------------------------------------------------------------------------------------------------------|-----------|
| #1 | "Geriatrics"[Mesh] OR "Geriatric Nursing"[Mesh] OR "Geriatricians"[Mesh] OR "Geriatric Assessment"[Mesh] OR "Health Services for the Aged"[Mesh] OR gerontology[tiab] OR geriatric[tiab] OR geriatrics[tiab] OR gerontologist[tiab] OR gerontologists[tiab] OR geriatrician[tiab] OR geriatricians[tiab] OR elderly[tiab] OR elder[tiab] OR elders[tiab] OR "older adult"[tiab] OR "older adults"[tiab] OR "older patient"[tiab] OR "older patients"[tiab] OR senior[tiab] OR seniors[tiab] OR senium[tiab] OR "aged care"[tiab] OR "Aged"[Mesh]                                                                                                                                                                                                                                                                                                                                                                                                                                                                                                                                                                                                                                                                                                                                                                                                                                                                                                                                                                                                                                                                                                                                                                                         | 2,871,510 |
| #2 | "Emergency Service, Hospital"[Mesh] OR "Emergency Medicine"[Mesh] OR "Emergency Nursing"[Mesh] OR "emergency medicine"[tiab] OR "emergency nursing"[tiab] OR "Hospital Emergency Service"[tiab] OR "Hospital Emergency Services"[tiab] OR "Emergency Hospital Service"[tiab] OR "Emergency Hospital Services"[tiab] OR "Emergency Department"[ti] OR "Emergency Departments"[ti] OR "Emergency Unit"[ti] OR "Emergency Units"[ti] OR "Emergency Ward"[ti] OR "Emergency Wards"[ti] OR "Emergency Room"[ti] OR "Emergency Rooms"[ti] OR "trauma center"[ti] OR "trauma centers"[ti] OR "trauma unit"[ti] OR "trauma units"[ti] OR (emergency[ti] AND hospital[ti])                                                                                                                                                                                                                                                                                                                                                                                                                                                                                                                                                                                                                                                                                                                                                                                                                                                                                                                                                                                                                                                                        | 91,901    |
| #3 | (#1 AND #2) AND English[lang]                                                                                                                                                                                                                                                                                                                                                                                                                                                                                                                                                                                                                                                                                                                                                                                                                                                                                                                                                                                                                                                                                                                                                                                                                                                                                                                                                                                                                                                                                                                                                                                                                                                                                                            | 17,218    |
| #4 | #3 NOT (("Adolescent"[Mesh] OR "Child"[Mesh] OR "Infant"[Mesh]) NOT "Adult"[Mesh])                                                                                                                                                                                                                                                                                                                                                                                                                                                                                                                                                                                                                                                                                                                                                                                                                                                                                                                                                                                                                                                                                                                                                                                                                                                                                                                                                                                                                                                                                                                                                                                                                                                       | 17,142    |
| #5 | #4 AND ("Patient Care Management"[Mesh] OR "Medication Errors"[Mesh] OR "Polypharmacy"[Mesh] OR "transitional care"[tiab] OR "transition care"[tiab] OR "case management"[tiab] OR "critical pathway"[tiab] OR "critical pathways"[tiab] OR "clinical pathway"[tiab] OR "clinical pathways"[tiab] OR "critical path"[tiab] OR "critical paths"[tiab] OR "clinical path"[tiab] OR "clinical paths"[tiab] OR "healthcare team"[tiab] OR "patient care team"[tiab] OR "patient management"[tiab] OR "medication management"[tiab] OR "drug therapy management"[tiab] OR "discharge planning"[tiab] OR "patient discharge"[tiab] OR "Outcome and Process Assessment (Health Care)"[Mesh] OR "Treatment Outcome"[Mesh] OR "Program Evaluation"[Mesh] OR "Patient Compliance"[Mesh] OR "Patient Satisfaction"[Mesh])                                                                                                                                                                                                                                                                                                                                                                                                                                                                                                                                                                                                                                                                                                                                                                                                                                                                                                                           | 6,321     |
| #6 | #5 AND ("randomized controlled trial"[ptyp] OR "controlled clinical trial"[ptyp] OR randomized[tiab] OR randomised[tiab] OR randomization[tiab] OR randomisation[tiab] OR placebo[tiab] OR randomly[tiab] OR trial[tiab] OR groups[tiab] OR "Comparative Study"[ptyp] OR "clinical trial"[pt] OR "clinical trial"[tiab] OR "clinical trials"[tiab] OR "evaluation studies"[ptyp] OR "evaluation studies as topic"[MeSH] OR "evaluation study"[tiab] OR "evaluation studies"[tiab] OR drug therapy[sh] OR "intervention study"[tiab] OR "intervention studies"[tiab] OR "case-control studies"[MeSH] OR "case-control"[tiab] OR "cohort studies"[MeSH] OR cohort[tiab] OR "longitudinal studies"[MeSH] OR longitudinal[tiab] OR longitudinally[tiab] OR prospective[tiab] OR prospectively[tiab] OR "retrospective studies"[MeSH] OR retrospective[tiab] OR "follow up"[tiab] OR "comparative study"[pt] OR "comparative studies"[tiab] OR nonrandom[tiab] OR "non-random"[tiab] OR nonrandomized[tiab] OR "non-randomized"[tiab] OR nonrandomised[tiab] OR "non-randomised"[tiab] OR quasi-experiment*[tiab] OR quasiexperiment*[tiab] OR quasirandom*[tiab] OR quasi-random*[tiab] OR quasi-control*[tiab] OR quasicontrol*[tiab] OR (controlled[tiab] AND (trial[tiab] OR study[tiab])) OR "pre-post"[tiab] OR "posttest"[tiab] OR "post-test"[tiab] OR pretest[tiab] OR pre-test[tiab] OR ("time series"[tiab] AND interrupt[tiab]) OR ("time points"[tiab] AND (multiple[tiab] OR one[tiab] OR two[tiab] OR three[tiab] OR four[tiab] OR five[tiab] OR six[tiab] OR seven[tiab] OR eight[tiab] OR nine[tiab] OR ten[tiab] OR month[tiab] OR monthly[tiab] OR day[tiab] OR daily[tiab] OR week[tiab] OR weekly[tiab] OR hour[tiab] OR | 4,930     |

|    |                                                                                                                                                                              |     |
|----|------------------------------------------------------------------------------------------------------------------------------------------------------------------------------|-----|
|    | hourly[tiab])) OR (before[tiab] AND after[tiab]) OR (before[tiab] AND during[tiab])) NOT (Editorial[ptyp] OR Letter[ptyp] OR Comment[ptyp]) NOT (animals[mh] NOT humans[mh]) |     |
| #7 | #6 AND ("2016/01/01"[Date - Publication] : "3000"[Date - Publication])                                                                                                       | 785 |

## CINAHL

|    |                                                                                                                                                                                                                                                                                                                                                                                                                                                                                                                                                                                                                                                                                                                                                                                                                                                                                                                                                                                                                                                                                                                                                                                                                                                                                                                                                                         |         |
|----|-------------------------------------------------------------------------------------------------------------------------------------------------------------------------------------------------------------------------------------------------------------------------------------------------------------------------------------------------------------------------------------------------------------------------------------------------------------------------------------------------------------------------------------------------------------------------------------------------------------------------------------------------------------------------------------------------------------------------------------------------------------------------------------------------------------------------------------------------------------------------------------------------------------------------------------------------------------------------------------------------------------------------------------------------------------------------------------------------------------------------------------------------------------------------------------------------------------------------------------------------------------------------------------------------------------------------------------------------------------------------|---------|
| S1 | (MH "Geriatrics") OR (MH "Gerontologic Nursing+") OR (MH "Gerontologic Nurse Practitioners") OR (MH "Geriatricians") OR (MH "Geriatric Assessment+") OR (MH "Health Services for the Aged") OR (MH "Gerontologic Care") OR TI (gerontology OR geriatric OR geriatrics OR gerontologist OR gerontologists OR geriatrician OR geriatricians OR elderly OR elder OR elders OR "older adult" OR "older adults" OR "older patient" OR "older patients" OR senior OR seniors OR senium OR "aged care")                                                                                                                                                                                                                                                                                                                                                                                                                                                                                                                                                                                                                                                                                                                                                                                                                                                                        | 170,880 |
| S2 | (MH "Emergency Service+") OR (MH "Triage") OR (MH "Physicians, Emergency") OR (MH "Emergency Nurse Practitioners") OR (MH "Emergency Medicine") OR (MH "Emergency Patients") OR TI ("emergency medicine" OR "emergency nursing" OR "Hospital Emergency Service" OR "Hospital Emergency Services" OR "Emergency Hospital Service" OR "Emergency Hospital Services" OR "Emergency Department" OR "Emergency Departments" OR "Emergency Unit" OR "Emergency Units" OR "Emergency Ward" OR "Emergency Wards" OR "Emergency Room" OR "Emergency Rooms" OR "trauma center" OR "trauma centers" OR "trauma unit" OR "trauma units") OR AB ("emergency medicine" OR "emergency nursing" OR "Hospital Emergency Service" OR "Hospital Emergency Services" OR "Emergency Hospital Service" OR "Emergency Hospital Services")                                                                                                                                                                                                                                                                                                                                                                                                                                                                                                                                                      | 67,453  |
| S3 | (S1 AND S2)<br>Limiters - English Language; Age Groups: Middle Aged: 45-64 years, Aged: 65+ years, Aged, 80 and over; Publication Type: Journal Article                                                                                                                                                                                                                                                                                                                                                                                                                                                                                                                                                                                                                                                                                                                                                                                                                                                                                                                                                                                                                                                                                                                                                                                                                 | 1,606   |
| S4 | (MH "Continuity of Patient Care+") OR (MM "Continuity of Patient Care In Old Age") OR (MH "Age Specific Care") OR (MH "Multidisciplinary Care Team+") OR (MH "Patient Care Plans+") OR (MH "Transitional Care") OR (MH "Critical Path") OR (MH "Medication Errors+") OR (MH "Polypharmacy") OR (MH "Outcomes (Health Care)+") OR (MH "Program Evaluation") OR (MH "Patient Compliance+") OR (MH "Medication Compliance") OR (MH "Organizational Compliance") OR (MH "Case Management") OR (MH "Patient Satisfaction") OR TI ("transitional care" OR "transition care" OR "case management" OR "critical pathway" OR "critical pathways" OR "clinical pathway" OR "clinical pathways" OR "critical path" OR "critical paths" OR "clinical path" OR "clinical paths" OR "healthcare team" OR "patient care team" OR "patient management" OR "medication management" OR "drug therapy management" OR "discharge planning" OR "patient discharge") OR AB ("transitional care" OR "transition care" OR "case management" OR "critical pathway" OR "critical pathways" OR "clinical pathway" OR "clinical pathways" OR "critical path" OR "critical paths" OR "clinical path" OR "clinical paths" OR "healthcare team" OR "patient care team" OR "patient management" OR "medication management" OR "drug therapy management" OR "discharge planning" OR "patient discharge") | 525,454 |
| S5 | S3 AND S4<br>Limiters - Publication Type: Journal Article; Published Date: 20160101-20171231                                                                                                                                                                                                                                                                                                                                                                                                                                                                                                                                                                                                                                                                                                                                                                                                                                                                                                                                                                                                                                                                                                                                                                                                                                                                            | 41      |

## EMBASE

|    |                                                                                                                                                                                                                                                                                                                                                                                                                                                                                                                                                                                                                                                                                                                                                                                                                                                                                                                                                                                                                                                                                                                                                                                                                |            |
|----|----------------------------------------------------------------------------------------------------------------------------------------------------------------------------------------------------------------------------------------------------------------------------------------------------------------------------------------------------------------------------------------------------------------------------------------------------------------------------------------------------------------------------------------------------------------------------------------------------------------------------------------------------------------------------------------------------------------------------------------------------------------------------------------------------------------------------------------------------------------------------------------------------------------------------------------------------------------------------------------------------------------------------------------------------------------------------------------------------------------------------------------------------------------------------------------------------------------|------------|
| #1 | 'geriatrics'/exp OR 'elderly care'/de OR 'geriatric care'/exp OR 'geriatrician'/exp OR 'geriatric assessment'/exp OR 'geriatric patient'/exp OR gerontology:ti,ab OR geriatric:ti,ab OR geriatrics:ti,ab OR gerontologist:ti,ab OR gerontologists:ti,ab OR geriatrician:ti,ab OR geriatricians:ti,ab OR elderly:ti,ab OR elder:ti,ab OR elders:ti,ab OR 'older adult':ti,ab OR 'older adults':ti,ab OR 'older patient':ti,ab OR 'older patients':ti,ab OR senior:ti,ab OR seniors:ti,ab OR senium:ti,ab OR 'aged care':ti,ab OR 'aged'/exp                                                                                                                                                                                                                                                                                                                                                                                                                                                                                                                                                                                                                                                                     | 2,851,327  |
| #2 | 'emergency health service'/exp OR 'emergency ward'/exp OR 'emergency treatment'/exp OR 'emergency medicine'/exp OR 'emergency nursing'/exp OR 'emergency medicine':ti,ab OR 'emergency nursing':ti,ab OR 'Hospital Emergency Service':ti,ab OR 'Hospital Emergency Services':ti,ab OR 'Emergency Hospital Service':ti,ab OR 'Emergency Hospital Services':ti,ab OR 'Emergency Department':ti OR 'Emergency Departments':ti OR 'Emergency Unit':ti OR 'Emergency Units':ti OR 'Emergency Ward':ti OR 'Emergency Wards':ti OR 'Emergency Room':ti OR 'Emergency Rooms':ti OR 'trauma center':ti OR 'trauma centers':ti OR 'trauma unit':ti OR 'trauma units':ti OR ((emergency NEAR/3 hospital):ti)                                                                                                                                                                                                                                                                                                                                                                                                                                                                                                              | 218,949    |
| #3 | #1 AND #2 AND [humans]/lim AND [english]/lim                                                                                                                                                                                                                                                                                                                                                                                                                                                                                                                                                                                                                                                                                                                                                                                                                                                                                                                                                                                                                                                                                                                                                                   | 28,538     |
| #4 | 'patient care'/exp OR 'clinical pathway'/exp OR 'medication error'/exp OR 'polypharmacy'/exp OR 'treatment outcome'/exp OR 'program evaluation'/exp OR 'patient satisfaction'/exp OR 'hospital discharge'/exp OR 'patient compliance'/exp OR 'transitional care':ti,ab OR 'transition care':ti,ab OR 'case management':ti,ab OR 'critical pathway':ti,ab OR 'critical pathways':ti,ab OR 'clinical pathway':ti,ab OR 'clinical pathways':ti,ab OR 'critical path':ti,ab OR 'critical paths':ti,ab OR 'clinical path':ti,ab OR 'clinical paths':ti,ab OR 'healthcare team':ti,ab OR 'patient care team':ti,ab OR 'patient management':ti,ab OR 'medication management':ti,ab OR 'drug therapy management':ti,ab OR 'discharge planning':ti,ab OR 'patient discharge':ti,ab                                                                                                                                                                                                                                                                                                                                                                                                                                      | 2,174,829  |
| #5 | #3 AND #4                                                                                                                                                                                                                                                                                                                                                                                                                                                                                                                                                                                                                                                                                                                                                                                                                                                                                                                                                                                                                                                                                                                                                                                                      | 9,717      |
| #6 | #5 AND [2016-2017]/py AND ([aged]/lim OR [very elderly]/lim)                                                                                                                                                                                                                                                                                                                                                                                                                                                                                                                                                                                                                                                                                                                                                                                                                                                                                                                                                                                                                                                                                                                                                   | 1,920      |
| #7 | ('randomized controlled trial'/exp OR 'crossover procedure'/exp OR 'double blind procedure'/exp OR 'single blind procedure'/exp OR random*:ti,ab OR factorial*:ti,ab OR crossover*:ti,ab OR ((cross NEAR/1 over*):ti,ab) OR placebo*:ti,ab OR ((doubl* NEAR/1 blind*):ti,ab) OR ((singl* NEAR/1 blind*):ti,ab) OR assign*:ti,ab OR allocat*:ti,ab OR volunteer*:ti,ab OR 'clinical study'/exp OR 'clinical trial':ti,ab OR 'clinical trials':ti,ab OR 'controlled study'/exp OR 'evaluation'/exp OR 'evaluation study':ti,ab OR 'evaluation studies':ti,ab OR 'intervention study':ti,ab OR 'intervention studies':ti,ab OR 'case control':ti,ab OR 'cohort analysis'/exp OR cohort:ti,ab OR longitudinal*:ti,ab OR prospective:ti,ab OR prospectively:ti,ab OR retrospective:ti,ab OR 'follow up'/exp OR 'follow up':ti,ab OR 'comparative effectiveness'/exp OR 'comparative study'/exp OR 'comparative study':ti,ab OR 'comparative studies':ti,ab OR 'evidence based medicine'/exp) NOT ('case report'/exp OR 'a case report':ti OR ': case report':ti OR 'case study'/exp OR 'editorial'/exp OR 'letter'/exp OR 'note'/exp OR [editorial]/lim OR [letter]/lim OR [note]/lim OR [conference abstract]/lim) | 10,270,358 |
| #8 | #6 AND #7                                                                                                                                                                                                                                                                                                                                                                                                                                                                                                                                                                                                                                                                                                                                                                                                                                                                                                                                                                                                                                                                                                                                                                                                      | 1,309      |
