# Supplementary material
Source: PubMed Central journal article supplement (PMC6677239)
Supplement: NIHMS1026504-supplement-Table_S2.pdf [file NIHMS1026504-supplement-Table_S2.pdf]

**Supplemental Table 2. Study eligibility criteria**

| Study Characteristic | Inclusion Criteria                                                                                                                                                                                                                                                                                                                                                                                                                                                            | Exclusion Criteria                                                                                                                                                                                                                                                                                                                                                                                                                                                                                                                                                                                                                                                                                                                                                |
|----------------------|-------------------------------------------------------------------------------------------------------------------------------------------------------------------------------------------------------------------------------------------------------------------------------------------------------------------------------------------------------------------------------------------------------------------------------------------------------------------------------|-------------------------------------------------------------------------------------------------------------------------------------------------------------------------------------------------------------------------------------------------------------------------------------------------------------------------------------------------------------------------------------------------------------------------------------------------------------------------------------------------------------------------------------------------------------------------------------------------------------------------------------------------------------------------------------------------------------------------------------------------------------------|
| <b>Population</b>    | Adults aged $\geq 65$ who present to an emergency department (ED) for acute, urgent, or emergency care                                                                                                                                                                                                                                                                                                                                                                        | <ul style="list-style-type: none"> <li>• Studies enrolling mixed samples with <math>&lt; 70\%</math> of participants aged <math>\geq 65</math></li> <li>• Studies enrolling condition-specific subgroups of older adults (eg, with a single presenting condition such as “falls” or “dementia”)</li> </ul>                                                                                                                                                                                                                                                                                                                                                                                                                                                        |
| <b>Interventions</b> | 4 intervention strategies (including those that use 1 or more strategies or are “multi-strategy”) <ul style="list-style-type: none"> <li>• Discharge planning</li> <li>• Case management/transition of care</li> <li>• Medication safety/medication review</li> <li>• Strategies designed or guided by the 2014 Geriatric Emergency Department Guidelines<sup>a,b,c</sup></li> </ul>                                                                                          | <ul style="list-style-type: none"> <li>• Interventions focused exclusively on risk or functional assessment instruments; otherwise-eligible interventions may utilize risk or functional assessment instruments to identify patients</li> <li>• Transition planning for patients who reside in nursing homes or involving transfers to other hospitals or hospital settings</li> <li>• Interventions focused on a single condition (eg, dementia) instead of general care of older adults in ED</li> <li>• Interventions focused on shared decision-making, including related to medication selection and management</li> <li>• Interventions performed after the final decision to admit the older adult to hospital or after discharge had been made</li> </ul> |
| <b>Comparator</b>    | Usual or enhanced ED care (eg, information or educational control)                                                                                                                                                                                                                                                                                                                                                                                                            | No comparator                                                                                                                                                                                                                                                                                                                                                                                                                                                                                                                                                                                                                                                                                                                                                     |
| <b>Outcomes</b>      | <ul style="list-style-type: none"> <li>• <b>Clinical outcomes:</b> Overall functional status (or subdomains of physical or mental functioning), health-related quality of life, mortality<sup>d</sup></li> <li>• <b>Patient satisfaction/experience:</b> Any validated measure of patient satisfaction/experience</li> <li>• <b>Care utilization:</b> ED readmission; hospitalization related to index ED visit; hospital admission rates (following ED discharge)</li> </ul> | <ul style="list-style-type: none"> <li>• Laboratory parameters (eg, A1c, cholesterol levels)</li> <li>• Disease-specific symptoms (eg, depressive symptoms, shortness of breath)</li> <li>• Guideline adherence</li> <li>• Prescribing behaviors</li> <li>• Patient/caregiver knowledge</li> </ul>                                                                                                                                                                                                                                                                                                                                                                                                                                                                |
| <b>Timing</b>        | <ul style="list-style-type: none"> <li>• Time points that are logically affected by the intervention and are clinically relevant, prioritizing short (eg, 30 days) and longer (eg, 90 days) time points</li> <li>• For patient satisfaction, within 30 days of admission/discharge</li> </ul>                                                                                                                                                                                 | None                                                                                                                                                                                                                                                                                                                                                                                                                                                                                                                                                                                                                                                                                                                                                              |
| <b>Setting</b>       | Emergency departments                                                                                                                                                                                                                                                                                                                                                                                                                                                         |                                                                                                                                                                                                                                                                                                                                                                                                                                                                                                                                                                                                                                                                                                                                                                   |
| <b>Study design</b>  | <ul style="list-style-type: none"> <li>• Randomized controlled trials</li> <li>• Quasi-experimental studies (prospective controlled designs:</li> </ul>                                                                                                                                                                                                                                                                                                                       | <ul style="list-style-type: none"> <li>• Retrospective studies</li> <li>• Cross-sectional designed studies</li> <li>• Cost-effectiveness analyses</li> </ul>                                                                                                                                                                                                                                                                                                                                                                                                                                                                                                                                                                                                      |

| Study Characteristic    | Inclusion Criteria                                                                                                                                                                                                                                     | Exclusion Criteria                                                                                                                                                                                                                                          |
|-------------------------|--------------------------------------------------------------------------------------------------------------------------------------------------------------------------------------------------------------------------------------------------------|-------------------------------------------------------------------------------------------------------------------------------------------------------------------------------------------------------------------------------------------------------------|
|                         | controlled nonrandomized trial, before-after cohort study, case-matched controlled; interrupted time-series designs) <ul style="list-style-type: none"> <li>• All studies must include an eligible comparator per EPOC criteria<sup>e</sup></li> </ul> | <ul style="list-style-type: none"> <li>• Program descriptions</li> </ul>                                                                                                                                                                                    |
| <b>Publication type</b> | <ul style="list-style-type: none"> <li>• English-language publications</li> <li>• 1990 to current date</li> <li>• OECD countries (North America, Australia, New Zealand, Japan, South Korea, Israel, Chile, Turkey, and Europe)</li> </ul>             | <ul style="list-style-type: none"> <li>• Non-English language</li> <li>• Not a full publication in a peer-reviewed journal</li> <li>• Meeting abstracts, letters, editorials, and dissertations.</li> <li>• Pilot studies or sample sizes &lt;20</li> </ul> |

<sup>a</sup> Carpenter CR, Bromley M, Caterino JM, Chun A, Gerson LW, Greenspan J, et al. Optimal older adult emergency care: introducing multidisciplinary geriatric emergency department guidelines from the American College of Emergency Physicians, American Geriatrics Society, Emergency Nurses Association, and Society for Academic Emergency Medicine. *Acad Emerg Med.* 2014;21(7):806-9.

<sup>b</sup> Carpenter CR, Bromley M, Caterino JM, Chun A, Gerson LW, Greenspan J, et al. Optimal older adult emergency care: introducing multidisciplinary geriatric emergency department guidelines from the American College of Emergency Physicians, American Geriatrics Society, Emergency Nurses Association, and Society for Academic Emergency Medicine. *Journal of the American Geriatrics Society.* 2014;62(7):1360-3.

<sup>c</sup> Carpenter CR, Bromley M, Caterino JM, Chun A, Gerson LW, Greenspan J, et al. Optimal older adult emergency care: Introducing multidisciplinary geriatric emergency department guidelines from the American College of Emergency Physicians, American Geriatrics Society, Emergency Nurses Association, and Society for Academic Emergency Medicine. *Ann Emerg Med.* 2014;63(5):e1-3.

<sup>d</sup> Given the potential array of conditions, disease-specific measures of severity and symptoms are not particularly practical or helpful to decision making; therefore we chose concepts that cut across conditions.

<sup>e</sup> EPOC. Effective Practice and Organisation of Care (EPOC). EPOC Resources for review authors. Oslo: Norwegian Knowledge Centre for the Health Services; 2015. Available at: <http://epoc.cochrane.org/resources/epoc-resources-review-authors>. Accessed November 3, 2017.

Abbreviations: A1c=glycosylated hemoglobin; ED=emergency department; EPOC=Effective Practice and Organisation of Care; OECD=Organisation for Economic Co-operation and Development
