# Supplementary material
Source: PubMed Central journal article supplement (PMC6677239)
Supplement: NIHMS1026504-supplement-Table_S4.pdf [file NIHMS1026504-supplement-Table_S4.pdf]

**Supplemental Table 4. Characteristics of randomized studies**

| Study<br>Country<br># Enrolled<br># of Arms        |  | Eligibility                                                                                                                                                                                        | Population<br>High Risk?<br>Mean Age (SD)<br>Female %<br>Race %<br>Living Alone %<br>Top 3 Conditions                                                                          | Outcomes Reported <sup>a</sup><br>Outcome Timing<br>Primary Outcome                                                                                                                                                         | Risk of Bias for<br>Objective and<br>Patient-<br>Reported<br>Outcomes <sup>b</sup> |
|----------------------------------------------------|--|----------------------------------------------------------------------------------------------------------------------------------------------------------------------------------------------------|--------------------------------------------------------------------------------------------------------------------------------------------------------------------------------|-----------------------------------------------------------------------------------------------------------------------------------------------------------------------------------------------------------------------------|------------------------------------------------------------------------------------|
| <b>Single-Strategy Interventions</b>               |  |                                                                                                                                                                                                    |                                                                                                                                                                                |                                                                                                                                                                                                                             |                                                                                    |
| <i>Case Management/Transition of Care</i>          |  |                                                                                                                                                                                                    |                                                                                                                                                                                |                                                                                                                                                                                                                             |                                                                                    |
| Basic, 2005 <sup>1</sup><br>Australia<br>224<br>2  |  | Inclusion: "Older adult" functional impairment; psychological disability; social disability; active multisystem disease<br><br>Exclusion <sup>c</sup> : Medically unstable; living in nursing home | High risk: Yes, based on functional status or other<br>Age: 78.7 (6.4)<br>Female: 60%<br>Race: NR<br>Living alone: 39%<br>Top 3: Musculoskeletal, cardiovascular, neurological | Functional status: Modified Barthel index<br>Hospitalization: At index <sup>d</sup> visit<br>Timing: Index visit<br><br>Primary: Index hospital admission, length of inpatient stay, functional decline                     | Objective: High<br>Patient: High                                                   |
| Caplan, 2004 <sup>2</sup><br>Australia<br>739<br>2 |  | Inclusion: Aged ≥75<br><br>Exclusion: Lived in a nursing home; previously enrolled in this study                                                                                                   | High risk: No<br>Age: 82.2 (6.0)<br>Female: 61%<br>Race: NR<br>Living alone: 39%<br>Top 3: Ischemic heart disease, falls, diabetes mellitus                                    | <b>Functional status:<br/>Composite</b><br>Mortality<br>Hospitalization: After index visit<br><br>ED readmit<br><br>Timing: 30 days; 3, 6, 12, 18 months<br><br>Primary: All hospital admissions within 30 days of ED visit | Objective: Low<br>Patient: Unclear                                                 |

| Study<br>Country<br># Enrolled<br># of Arms       |  | Eligibility                                                                                                                                                                                                                                                   | Population<br>High Risk?<br>Mean Age (SD)<br>Female %<br>Race %<br>Living Alone %<br>Top 3 Conditions                                                 | Outcomes Reported <sup>a</sup><br>Outcome Timing<br>Primary Outcome                                                                                                                                                                                                                                             | Risk of Bias for<br>Objective and<br>Patient-<br>Reported<br>Outcomes <sup>b</sup> |
|---------------------------------------------------|--|---------------------------------------------------------------------------------------------------------------------------------------------------------------------------------------------------------------------------------------------------------------|-------------------------------------------------------------------------------------------------------------------------------------------------------|-----------------------------------------------------------------------------------------------------------------------------------------------------------------------------------------------------------------------------------------------------------------------------------------------------------------|------------------------------------------------------------------------------------|
| Gagnon, 1999 <sup>3</sup><br>Canada<br>427<br>2   |  | Inclusion: Aged ≥70 with cardiac disease (part of risk assessment)<br><br>Exclusion: Admitted to ED from long-term care facility or nursing home; currently in another research study or followed by a geriatric team; hospitalized; partner already enrolled | High risk: Yes, based on ADL and Boult assessment tool<br>Age: 81.6 (6.4)<br>Female: 58%<br>Race: NR<br>Living alone: 61%<br>Top 3: Diabetes, cardiac | Functional Status: ADL, IADL<br>Quality of life: SF-36<br>Mortality<br>Patient experience<br>Hospitalization: follow-up<br>ED readmit<br><br>Timing: 10 months<br><br>Primary: Quality of life, satisfaction with care, functional status, admission to hospital, length of hospital stay, or readmission to ED | Objective:<br>Unclear<br>Patient: Unclear                                          |
| Runciman, 1996 <sup>4</sup><br>Europe<br>424<br>2 |  | Inclusion: Aged ≥75; accident<br><br>Exclusion: NR                                                                                                                                                                                                            | High risk: No<br>Age: 81 (NR)<br>Female: NR<br>Race: NR<br>Living alone: NR<br>Top 3: Fall and soft-tissue injury                                     | <b>Functional Status: SF-36</b><br><b>Patient experience:</b><br><b>Informal</b><br>ED readmit<br><br>Timing: 4 weeks<br><br>Primary: Patient satisfaction, ED readmission rate, dependency, functional outcome                                                                                                 | Objective:<br>Unclear<br>Patient: Unclear                                          |

| Study<br>Country<br># Enrolled<br># of Arms                       |  | Eligibility                                                                                                                                                                                                                                                                                   | Population<br>High Risk?<br>Mean Age (SD)<br>Female %<br>Race %<br>Living Alone %<br>Top 3 Conditions                                                          | Outcomes Reported <sup>a</sup><br>Outcome Timing<br>Primary Outcome                                                                                                                                                                                                                                   | Risk of Bias for<br>Objective and<br>Patient-<br>Reported<br>Outcomes <sup>b</sup> |
|-------------------------------------------------------------------|--|-----------------------------------------------------------------------------------------------------------------------------------------------------------------------------------------------------------------------------------------------------------------------------------------------|----------------------------------------------------------------------------------------------------------------------------------------------------------------|-------------------------------------------------------------------------------------------------------------------------------------------------------------------------------------------------------------------------------------------------------------------------------------------------------|------------------------------------------------------------------------------------|
| <b>Multi-Strategy Interventions</b>                               |  |                                                                                                                                                                                                                                                                                               |                                                                                                                                                                |                                                                                                                                                                                                                                                                                                       |                                                                                    |
| <i>Discharge Planning PLUS Case Management/Transition of Care</i> |  |                                                                                                                                                                                                                                                                                               |                                                                                                                                                                |                                                                                                                                                                                                                                                                                                       |                                                                                    |
| Eklund, 2013 <sup>5</sup><br>Europe<br>181<br>2                   |  | Inclusion: Aged 65-79 with 1 or more chronic disease and dependent in 1 or more ADLs, or ≥ age 80<br><br>Exclusion: Dementia; palliative care; and acute severe illness with immediate need of assessment and treatment by physician                                                          | High risk: Yes, based on ADL and diagnosis<br>Age: NR<br>Female: 55%<br>Race: NR<br>Living alone: NR<br>Top 3: Frail, visual impairment                        | <b>Functional status</b><br><br>Timing: 3, 6, 9, 12 months<br><br>Primary: Frailty (Berg Balance scale)                                                                                                                                                                                               | Objective: NA<br>Patient: High                                                     |
| McCusker, 2001 <sup>6</sup><br>Canada<br>388<br>2                 |  | Inclusion: Aged ≥65<br><br>Exclusion: Referred from nursing home or chronic disease hospital; patient expected by ED staff to be admitted; medically unstable or cognitively impaired with no family as proxy; already seen by a member of the hospital's geriatric staff prior to enrollment | High risk: Yes, based on ISAR score<br>Age: 76.6 (7.0)<br>Female: 61%<br>Race: NR<br>Living alone: 40%<br>Top 3: Cardiorespiratory, musculoskeletal, digestive | <b>Functional status: ADL</b><br><b>Patient experience</b><br>Hospitalization: At index visit<br>ED readmit<br>Costs<br><br>Timing: 1, 4 months<br><br>Primary: functional status and depression, change in caregiver physical and mental health status, patient and caregiver satisfaction with care | Objective: Low<br>Patient: Low                                                     |

| Study<br>Country<br># Enrolled<br># of Arms                          |  | Eligibility                                                                                                                                                                                                                                                                     | Population<br>High Risk?<br>Mean Age (SD)<br>Female %<br>Race %<br>Living Alone %<br>Top 3 Conditions                        | Outcomes Reported <sup>a</sup><br>Outcome Timing<br>Primary Outcome                                                                                                                                                                                           | Risk of Bias for<br>Objective and<br>Patient-<br>Reported<br>Outcomes <sup>b</sup> |
|----------------------------------------------------------------------|--|---------------------------------------------------------------------------------------------------------------------------------------------------------------------------------------------------------------------------------------------------------------------------------|------------------------------------------------------------------------------------------------------------------------------|---------------------------------------------------------------------------------------------------------------------------------------------------------------------------------------------------------------------------------------------------------------|------------------------------------------------------------------------------------|
| Mion, 2003 <sup>7</sup><br>USA<br>650<br>2                           |  | Inclusion: Aged ≥65<br><br>Exclusion: Not expected to discharge from ED; impaired hearing; no family caregiver as proxy for cognitively impaired                                                                                                                                | High risk: No<br>Age: 74.4 (6.9)<br>Female: 59%<br>Race: White (39%), other categories (NR)<br>Living alone: NR<br>Top 3: NR | Functional status: SF36<br>Mortality<br><b>Patient experience</b><br>Hospitalization: After index visit<br>ED readmit<br>Costs<br><br>Timing: 30, 120 days<br><br>Primary: Health care service use (defined as ED, hospital, nursing home, health care costs) | Objective: Low<br>Patient: Low                                                     |
| <i>Case Management/Transition of Care PLUS Medication Management</i> |  |                                                                                                                                                                                                                                                                                 |                                                                                                                              |                                                                                                                                                                                                                                                               |                                                                                    |
| Biese, 2014 <sup>8</sup><br>USA<br>178<br>3                          |  | Inclusion: Aged ≥65<br><br>Exclusion: Admitted to hospital; discharged to setting other than home; not referred to outpatient follow-up; cognitively impaired; patient excluded from primary outcome ONLY if returned to ED or was hospitalized within 5 days of index ED visit | High risk: No<br>Age: 75 (7.58)<br>Female: 60%<br>Race: White (67%-74%), Black (23%-31%)<br>Living alone: NR<br>Top 3: NR    | Hospitalization: After index visit<br>ED readmit<br>Costs<br><br>Timing: 35 days<br><br>Primary: Post-ED discharge measured by expedited outpatient follow-up and/or increased compliance with medication changes                                             | Objective: High<br>Patient: High                                                   |

| Study<br>Country<br># Enrolled<br># of Arms  |  | Eligibility                                                                                                                                                                                                                                                | Population<br>High Risk?<br>Mean Age (SD)<br>Female %<br>Race %<br>Living Alone %<br>Top 3 Conditions                                                        | Outcomes Reported <sup>a</sup><br>Outcome Timing<br>Primary Outcome                                                                                                                       | Risk of Bias for<br>Objective and<br>Patient-<br>Reported<br>Outcomes <sup>b</sup> |
|----------------------------------------------|--|------------------------------------------------------------------------------------------------------------------------------------------------------------------------------------------------------------------------------------------------------------|--------------------------------------------------------------------------------------------------------------------------------------------------------------|-------------------------------------------------------------------------------------------------------------------------------------------------------------------------------------------|------------------------------------------------------------------------------------|
| Biese, 2017 <sup>9</sup><br>USA<br>2000<br>2 |  | Inclusion: Aged ≥65<br><br>Exclusion: discharged to hospice or skilled care facility or correctional institution; failed cognitive test; no phone; no ER note; psychiatric reason for ER visit; left ER against medical advice prior enrollment or refusal | High risk: No<br>Age: 74 (7.1)<br>Female: 60%<br>Race: White (77%), Black (19%)<br>Living alone: NR<br>Top 3: Traumatic injury, pain (any), cardiac symptoms | Mortality<br>Hospitalization: After index visit<br><br>ED readmit<br><br>Timing: 30 days<br><br>Primary: Composite of # days from ED discharge to return to ED, hospitalization, or death | Objective:<br>Unclear<br>Patient: High                                             |

<sup>a</sup> Outcomes limited to those prioritized for this review. Bolded text reflects outcomes with a positive effect of intervention strategies.

<sup>b</sup> Objective outcomes (*ie*, non-patient-reported outcomes): mortality, hospitalization, ED readmission. Patient-reported outcomes; health-related quality of life, functional status, patient experience.

<sup>c</sup> Exclusion criteria shown are limited to those relevant to this review.

<sup>d</sup> Index refers to the ED visit during which study enrolment occurred.

Abbreviations: ADL=activities of daily living; ED=emergency department; IADL=independent activities of daily living; ISAR=identification of seniors at risk; NA=not applicable; NR=not reported; SD=standard deviation; SF-36=short-form health assessment questionnaire

## References

1. Basic D, Conforti DA. A prospective, randomised controlled trial of an aged care nurse intervention within the Emergency Department. *Aust Health Rev* 2005;29:51-9.
2. Caplan GA, Williams AJ, Daly B, Abraham K. A randomized, controlled trial of comprehensive geriatric assessment and multidisciplinary intervention after discharge of elderly from the emergency department--the DEED II study. *J Am Geriatr Soc* 2004;52:1417-23.
3. Gagnon AJ, Schein C, McVey L, Bergman H. Randomized controlled trial of nurse case management of frail older people. *J Am Geriatr Soc* 1999;47:1118-24.
4. Runciman P, Currie CT, Nicol M, Green L, McKay V. Discharge of elderly people from an accident and emergency department: evaluation of health visitor follow-up. *J Adv Nurs* 1996;24:711-8.
5. Eklund K, Wilhelmson K, Gustafsson H, Landahl S, Dahlin-Ivanoff S. One-year outcome of frailty indicators and activities of daily living following the randomised controlled trial: "Continuum of care for frail older people". *BMC Geriatr* 2013;13:76.
6. McCusker J, Verdon J, Tousignant P, de Courval LP, Dendukuri N, Belzile E. Rapid emergency department intervention for older people reduces risk of functional decline: results of a multicenter randomized trial. *J Am Geriatr Soc* 2001;49:1272-81.
7. Mion LC, Palmer RM, Meldon SW, et al. Case finding and referral model for emergency department elders: a randomized clinical trial. *Ann Emerg Med* 2003;41:57-68.
8. Biese K, Lamantia M, Shofer F, et al. A randomized trial exploring the effect of a telephone call follow-up on care plan compliance among older adults discharged home from the emergency department. *Acad Emerg Med* 2014;21:188-95.
9. Biese KJ, Busby-Whitehead J, Cai J, et al. Telephone follow-up for older adults discharged to home from the emergency department: a pragmatic randomized controlled trial. *J Am Geriatr Soc* 2018;66:452-8.
