# Supplementary material
Source: PubMed Central journal article supplement (PMC6677239)
Supplement: NIHMS1026504-supplement-Table_S5.pdf [file NIHMS1026504-supplement-Table_S5.pdf]

**Supplemental Table 5. Characteristics of nonrandomized studies**

| Study<br>Country<br># Enrolled<br># of Arms          |  | Eligibility                                                                                                                                                                                                                                                                                                                                            | Population<br>High Risk?<br>Mean Age (SD)<br>Female %<br>Race %<br>Living Alone %<br>Top 3 Conditions                                                                                           | Outcomes Reported <sup>a</sup><br>Outcome Timing<br>Primary Outcome                                                                          | Risk of Bias<br>for<br>Objective and<br>Patient-<br>Reported<br>Outcomes <sup>b</sup> |
|------------------------------------------------------|--|--------------------------------------------------------------------------------------------------------------------------------------------------------------------------------------------------------------------------------------------------------------------------------------------------------------------------------------------------------|-------------------------------------------------------------------------------------------------------------------------------------------------------------------------------------------------|----------------------------------------------------------------------------------------------------------------------------------------------|---------------------------------------------------------------------------------------|
| <b>Single-Strategy Interventions</b>                 |  |                                                                                                                                                                                                                                                                                                                                                        |                                                                                                                                                                                                 |                                                                                                                                              |                                                                                       |
| <i>Discharge Planning</i>                            |  |                                                                                                                                                                                                                                                                                                                                                        |                                                                                                                                                                                                 |                                                                                                                                              |                                                                                       |
| Arendts, 2012 <sup>1</sup><br>Australia<br>5265<br>2 |  | Inclusion: Aged ≥65; 10 conditions including UTI, respiratory infection, fall with minor injury, hip or knee pain, back pain, cardiac failure, angina pectoris, syncope, TIA, new onset confusion or delirium<br><br>Exclusion <sup>c</sup> : Need for immediate resuscitation; triage to critical care bay in ED or other urgent medical input needed | High risk: Yes, diagnosis<br>Age: 79.6 (8.0)<br>Female: 55%<br>Race: NR<br>Living alone: 30%<br>Top 3: Angina, cardiac failure, respiratory infection                                           | Hospitalization: At index <sup>d</sup> visit<br><br>Timing: At index visit<br><br>Primary outcome: Proportion of hospital admissions from ED | Objective: High<br>Patient: NA                                                        |
| Arendts, 2013 <sup>2</sup><br>Australia<br>2196<br>2 |  | Inclusion: Aged ≥65<br><br>Exclusion: cognitively impaired without surrogate; ED arrival and discharge between 21:00 and 7:00                                                                                                                                                                                                                          | High risk: Yes, admitted<br>Age: 77.5 (8.0)<br>Female: 56%<br>Race: NR<br>Living alone: 31%<br>Top 3: Fall (no injury or minor injury), ischemic chest pain, non-traumatic musculoskeletal pain | Mortality<br>Hospitalization: After index visit<br>ED readmission<br><br>Timing: 28 days<br><br>Primary outcome: ED visit within 28 days     | Objective: High<br>Patient: NA                                                        |

| Study<br>Country<br># Enrolled<br># of Arms             |  | Eligibility                                                                                                                                                                                                                                                                                         | Population<br>High Risk?<br>Mean Age (SD)<br>Female %<br>Race %<br>Living Alone %<br>Top 3 Conditions                                                      | Outcomes Reported <sup>a</sup><br>Outcome Timing<br>Primary Outcome                                                                                               | Risk of Bias<br>for<br>Objective and<br>Patient-<br>Reported<br>Outcomes <sup>b</sup> |
|---------------------------------------------------------|--|-----------------------------------------------------------------------------------------------------------------------------------------------------------------------------------------------------------------------------------------------------------------------------------------------------|------------------------------------------------------------------------------------------------------------------------------------------------------------|-------------------------------------------------------------------------------------------------------------------------------------------------------------------|---------------------------------------------------------------------------------------|
| <i>Case Management/Transition of Care</i>               |  |                                                                                                                                                                                                                                                                                                     |                                                                                                                                                            |                                                                                                                                                                   |                                                                                       |
| Pedersen,<br>2016 <sup>3</sup><br>Europe<br>1330<br>2   |  | Inclusion: Aged ≥70; pneumonia, COPD, delirium, dehydration, UTI, constipation, anemia, heart failure, other infections<br><br>Exclusion: Terminal at admission; already in a follow-up program with the geriatric team; living out of the municipality; transferred to another hospital department | High risk: Yes, diagnosis<br>Age 86.4 (6.2)<br>Female: 62%<br>Race: NR<br>Living alone: 52%<br>Top 3: Urinary tract infection, other infections, pneumonia | Mortality<br><b>ED readmit</b><br><b>Hospitalization: After index</b><br><br>Timing: 30 days<br><br>Primary outcome: ED<br>Readmission rate                       | Objective: Low<br>Patient: NA                                                         |
| <i>Medication Management</i>                            |  |                                                                                                                                                                                                                                                                                                     |                                                                                                                                                            |                                                                                                                                                                   |                                                                                       |
| Mortimer,<br>2011 <sup>4</sup><br>Australia<br>199<br>2 |  | Inclusion: Aged ≥65 with chronic condition; aged ≥70 without chronic condition; Australasian triage category 2<br><br>Exclusion: Australasian triage category 1 (requiring immediate attention)                                                                                                     | High risk: No<br>Age: 77.3 (NR)<br>Female: 54%<br>Race: NR<br>Living alone: NR<br>Top 3: "Medical" patient, "surgical" patient, third condition NR         | Patient experience<br>ED readmission<br><br>Timing: Index, 14 & 28 days<br><br>Primary outcome: NR but power calculation for ED length of stay and ED readmission | Objective: High<br>Patient: High                                                      |

| Study<br>Country<br># Enrolled<br># of Arms                       |  | Eligibility                                                                                                                                                                                                                                                                                                          | Population<br>High Risk?<br>Mean Age (SD)<br>Female %<br>Race %<br>Living Alone %<br>Top 3 Conditions                                                                                                                  | Outcomes Reported <sup>a</sup><br>Outcome Timing<br>Primary Outcome                                                                                                                      | Risk of Bias<br>for<br>Objective and<br>Patient-<br>Reported<br>Outcomes <sup>b</sup> |
|-------------------------------------------------------------------|--|----------------------------------------------------------------------------------------------------------------------------------------------------------------------------------------------------------------------------------------------------------------------------------------------------------------------|------------------------------------------------------------------------------------------------------------------------------------------------------------------------------------------------------------------------|------------------------------------------------------------------------------------------------------------------------------------------------------------------------------------------|---------------------------------------------------------------------------------------|
| <b>Multi-Strategy Interventions</b>                               |  |                                                                                                                                                                                                                                                                                                                      |                                                                                                                                                                                                                        |                                                                                                                                                                                          |                                                                                       |
| <i>Discharge Planning PLUS Case Management/Transition of Care</i> |  |                                                                                                                                                                                                                                                                                                                      |                                                                                                                                                                                                                        |                                                                                                                                                                                          |                                                                                       |
| Bond, 2014 <sup>5</sup><br>Canada<br>1820<br>2                    |  | Inclusion: Aged ≥65; ICD-10 discharge diagnosis of fall, fracture, sprain, strain, laceration, contusion, superficial injury, or bursitis<br><br>Exclusion: Discharge diagnosis of hip fracture or trimalleolar ankle fracture; patients who presented to ED for a musculoskeletal complaint within previous 30 days | High risk: Yes, diagnosis and falls<br>Age: 80.5 (8.0)<br>Female: 70%<br>Race: NR<br>Living alone: NR<br>Top 3: NR                                                                                                     | Hospitalization: At index visit<br>Hospitalization: After index visit<br>ED readmission<br><br>Timing: 30 days<br><br>Primary outcome: Hospital admission rate at index visit            | Objective: High<br>Patient: NA                                                        |
| Miller, 1996 <sup>6</sup><br>USA<br>770<br>2                      |  | Inclusion: Aged ≥65<br><br>Exclusion: Acute illness too severe to permit participation; having <1 hour stay/departure without being seen; revisit by a previously included patient; lack of proxy for patients who did not appear to understand informed consent                                                     | High risk: No<br>Age 75.0 (7.0)<br>Female: 60%<br>Race: White (67%), Black/Other (32%)<br>Living alone: 35% (only for intervention group; control data not provided)<br>Top 3: Delirium, depression and undernutrition | Functional status: ADL/IADL, quality of life<br>Mortality<br>Hospitalization: After index visit (# nights)<br>ED readmission<br>Costs<br><br>Timing: 3 months<br><br>Primary outcome: NR | Objective: High<br>Patient: High                                                      |

<sup>a</sup> Outcomes limited to those prioritized for this review. Bolded text reflects outcomes with a positive effect of intervention strategies.

<sup>b</sup> Objective outcomes (*ie*, non-patient-reported outcomes): mortality, hospitalization, ED readmission. Patient-reported outcomes: health-related quality of life, functional status, patient experience.

<sup>c</sup> Exclusion criteria shown are limited to those relevant to this review.

<sup>d</sup> Index refers to the emergency department visit during which study enrolment occurred.

Abbreviations: ADL=activities of daily living; COPD=chronic obstructive pulmonary disease; ED=emergency department; IADL=independent activities of daily living; ISAR=identification of seniors at risk; NA=not applicable; NR=not reported; SD=standard deviation; SF-36=short-form health assessment questionnaire; TIA=transient ischemic attack; UTI=urinary tract infection

## References

1. Arendts G, Fitzhardinge S, Pronk K, Donaldson M, Hutton M, Nagree Y. The impact of early emergency department allied health intervention on admission rates in older people: a non-randomized clinical study. *BMC Geriatr* 2012;12:8.
2. Arendts G, Fitzhardinge S, Pronk K, Hutton M. Outcomes in older patients requiring comprehensive allied health care prior to discharge from the emergency department. *Emerg Med Australas* 2013;25:127-31.
3. Pedersen LH, Gregersen M, Barat I, Damsgaard EM. Early geriatric follow-up after discharge reduces readmissions – A quasi-randomised controlled trial. *Eur Geriatr Med* 2016;7:443-8.
4. Mortimer C, Emmerton L, Lum E. The impact of an aged care pharmacist in a department of emergency medicine. *J Eval Clin Pract* 2011;17:478-85.
5. Bond CM, Freiheit EA, Podruzny L, et al. The emergency to home project: impact of an emergency department care coordinator on hospital admission and emergency department utilization among seniors. *Int J Emerg Med* 2014;7:18.
6. Miller DK, Lewis LM, Nork MJ, Morley JE. Controlled trial of a geriatric case-finding and liaison service in an emergency department. *J Am Geriatr Soc* 1996;44:513-20.
