# Supplementary material
Source: PubMed Central journal article supplement (PMC6677239)
Supplement: NIHMS1026504-supplement-Table_S6.pdf [file NIHMS1026504-supplement-Table_S6.pdf]

## Supplemental Table 6. Intervention characteristics of randomized studies

Patient-focused intervention components include comprehensive assessment and/or risk screening, patient and/or caregiver education and/or support, intervention (medication, rehabilitation). Provider or systems-focused intervention components include planned follow-up communication or visit, referral to provider, specialist or community resource, continuity of care/care coordination, and changes to ED environment and/or procedures.

| Study                                     | Intervention Setting/Timing<br>Intervention Target                   | # of Providers<br>Type of Provider(s)<br>Geriatrics Trained? | Patient-focused<br>Intervention<br>Components <sup>a</sup>                                                                                                                                                                     | Provider- or System-<br>focused Intervention<br>Components <sup>a</sup>                                                                                                                            | Key Intervention<br>Components<br>Present                                                                                  | Mode of Delivery<br># Planned Contacts |
|-------------------------------------------|----------------------------------------------------------------------|--------------------------------------------------------------|--------------------------------------------------------------------------------------------------------------------------------------------------------------------------------------------------------------------------------|----------------------------------------------------------------------------------------------------------------------------------------------------------------------------------------------------|----------------------------------------------------------------------------------------------------------------------------|----------------------------------------|
| <b>Single-Strategy Interventions</b>      |                                                                      |                                                              |                                                                                                                                                                                                                                |                                                                                                                                                                                                    |                                                                                                                            |                                        |
| <i>Case Management/Transition of Care</i> |                                                                      |                                                              |                                                                                                                                                                                                                                |                                                                                                                                                                                                    |                                                                                                                            |                                        |
| Basic, 2005 <sup>1</sup>                  | Pre-ED discharge<br>Patient                                          | Single provider<br>RN<br>Yes                                 | <ul style="list-style-type: none"> <li>• <b>Comprehensive assessment</b></li> <li>• <b>Caregiver support</b></li> <li>• <i>No medication review or rehabilitation intervention</i></li> </ul>                                  | <ul style="list-style-type: none"> <li>• <b>Referral to specialists</b></li> <li>• <b>Communication between providers</b></li> <li>• <i>No follow-up</i></li> </ul>                                | <ul style="list-style-type: none"> <li>• Assessment</li> </ul>                                                             | In-person<br>1                         |
| Caplan, 2004 <sup>2</sup>                 | Before and after<br>ED discharge<br>(Bridge) <sup>b</sup><br>Patient | Multiple providers<br>MD, RN, PT<br>Yes                      | <ul style="list-style-type: none"> <li>• <b>Semi-structured assessment of function &amp; cognition</b></li> <li>• <i>No education/support</i></li> <li>• <i>No medication review or rehabilitation intervention</i></li> </ul> | <ul style="list-style-type: none"> <li>• <b>Follow-up communication</b></li> <li>• <b>Referrals to specialists, community services</b></li> <li>• <b>Interdisciplinary team meeting</b></li> </ul> | <ul style="list-style-type: none"> <li>• Assessment</li> <li>• Referral plus follow-up</li> <li>• Bridge design</li> </ul> | In-person<br>1                         |
| Gagnon, 1999 <sup>3</sup>                 | Post-ED<br>Patient                                                   | Single provider<br>RN<br>Yes                                 | <ul style="list-style-type: none"> <li>• <b>Comprehensive assessment</b></li> <li>• <i>No education/support</i></li> <li>• <i>No medication review or rehabilitation intervention</i></li> </ul>                               | <ul style="list-style-type: none"> <li>• <b>Follow-up visit scheduled</b></li> <li>• <b>Interdisciplinary team meeting</b></li> <li>• <i>No referrals to specialist</i></li> </ul>                 | <ul style="list-style-type: none"> <li>• Assessment</li> </ul>                                                             | In-person<br>NR                        |
| Runciman, 1996 <sup>4</sup>               | Post-ED<br>Patient                                                   | Multiple providers<br>PT<br>NR                               | <ul style="list-style-type: none"> <li>• <b>Comprehensive in-home assessment</b></li> <li>• <i>No education/support</i></li> </ul>                                                                                             | <ul style="list-style-type: none"> <li>• <b>Referrals to community services</b></li> <li>• <i>No follow-up</i></li> <li>• <i>No continuity of care</i></li> </ul>                                  | <ul style="list-style-type: none"> <li>• Assessment</li> </ul>                                                             | In-person<br>NR                        |

| Study                                                                | Intervention Setting/Timing Intervention Target                        | # of Providers Type of Provider(s) Geriatrics Trained? | Patient-focused Intervention Components <sup>a</sup>                                                                                                                                                | Provider- or System-focused Intervention Components <sup>a</sup>                                                                                                                 | Key Intervention Components Present                                                                                  | Mode of Delivery # Planned Contacts |
|----------------------------------------------------------------------|------------------------------------------------------------------------|--------------------------------------------------------|-----------------------------------------------------------------------------------------------------------------------------------------------------------------------------------------------------|----------------------------------------------------------------------------------------------------------------------------------------------------------------------------------|----------------------------------------------------------------------------------------------------------------------|-------------------------------------|
|                                                                      |                                                                        |                                                        | <ul style="list-style-type: none"> <li>No medication review or rehabilitation intervention</li> </ul>                                                                                               |                                                                                                                                                                                  |                                                                                                                      |                                     |
| <b>Multi-Strategy Interventions</b>                                  |                                                                        |                                                        |                                                                                                                                                                                                     |                                                                                                                                                                                  |                                                                                                                      |                                     |
| <i>Discharge Planning PLUS Case Management/Transition of Care</i>    |                                                                        |                                                        |                                                                                                                                                                                                     |                                                                                                                                                                                  |                                                                                                                      |                                     |
| Eklund, 2013 <sup>5</sup>                                            | Before and after ED discharge (Bridge) <sup>b</sup> Patient            | Multiple providers RN Yes                              | <ul style="list-style-type: none"> <li><b>Frailty screening &amp; geriatric assessment</b></li> <li>No education/support</li> <li>No medication review or rehabilitation intervention</li> </ul>    | <ul style="list-style-type: none"> <li><b>Follow-up visit scheduled</b></li> <li><b>Interdisciplinary team meeting</b></li> <li>No referrals</li> </ul>                          | <ul style="list-style-type: none"> <li>Assessment</li> <li>Referral plus follow-up</li> <li>Bridge design</li> </ul> | In-person, telephone NR             |
| McCusker, 2001 <sup>6</sup>                                          | Before and after ED discharge (Bridge) <sup>b</sup> Patient            | Multiple providers MD, RN, SW Yes                      | <ul style="list-style-type: none"> <li><b>Brief standardized geriatric nursing assessment</b></li> <li>No education/support</li> <li>No medication review or rehabilitation intervention</li> </ul> | <ul style="list-style-type: none"> <li><b>Follow-up communication</b></li> <li><b>Referral to primary care provider, specialists</b></li> <li>No continuity of care</li> </ul>   | <ul style="list-style-type: none"> <li>Assessment</li> <li>Referral plus follow-up</li> <li>Bridge design</li> </ul> | In-person, telephone NR             |
| Mion, 2003 <sup>7</sup>                                              | Before and after ED discharge (Bridge) <sup>b</sup> Patient, caregiver | Multiple providers RN, SW Yes                          | <ul style="list-style-type: none"> <li><b>Comprehensive geriatric assessment</b></li> <li><b>Caregiver support</b></li> <li>No medication review or rehabilitation intervention</li> </ul>          | <ul style="list-style-type: none"> <li><b>Follow-up communication</b></li> <li><b>Referrals to community services</b></li> <li><b>Communication between providers</b></li> </ul> | <ul style="list-style-type: none"> <li>Assessment</li> <li>Referral plus follow-up</li> <li>Bridge design</li> </ul> | In-person, telephone NR             |
| <i>Case Management/Transition of Care PLUS Medication Management</i> |                                                                        |                                                        |                                                                                                                                                                                                     |                                                                                                                                                                                  |                                                                                                                      |                                     |
| Biese, 2014 <sup>8</sup>                                             | Post-ED Patient                                                        | Single provider RN NR                                  | <ul style="list-style-type: none"> <li><b>Medication review</b></li> <li>No assessment/screening</li> <li>No education/support</li> <li>No rehabilitation intervention</li> </ul>                   | <ul style="list-style-type: none"> <li><b>Follow-up visits scheduled</b></li> <li><b>Referrals to community services</b></li> <li>No continuity of care</li> </ul>               | <ul style="list-style-type: none"> <li>Referral plus follow-up</li> </ul>                                            | Telephone NR                        |
| Biese, 2017 <sup>9</sup>                                             | Post-ED Patient                                                        | Single provider RN NR                                  | <ul style="list-style-type: none"> <li><b>Medication review</b></li> <li>No assessment screening</li> <li>No education/support</li> </ul>                                                           | <ul style="list-style-type: none"> <li><b>Referrals to community services</b></li> <li>No follow-up</li> <li>No continuity of care</li> </ul>                                    | <ul style="list-style-type: none"> <li>Referral plus follow-up</li> </ul>                                            | Telephone 1                         |

| Study | Intervention Setting/Timing<br>Intervention Target | # of Providers<br>Type of Provider(s)<br>Geriatrics Trained? | Patient-focused<br>Intervention<br>Components <sup>a</sup>                                                             | Provider- or System-<br>focused Intervention<br>Components <sup>a</sup> | Key Intervention<br>Components<br>Present | Mode of Delivery<br># Planned Contacts |
|-------|----------------------------------------------------|--------------------------------------------------------------|------------------------------------------------------------------------------------------------------------------------|-------------------------------------------------------------------------|-------------------------------------------|----------------------------------------|
|       |                                                    |                                                              | <ul style="list-style-type: none"> <li data-bbox="800 321 1041 378">• <i>No rehabilitation intervention</i></li> </ul> |                                                                         |                                           |                                        |

<sup>a</sup> Bolded text indicates intervention components that were present in the study. Italicized text indicates intervention components were not present in the study.

<sup>b</sup> Bridge setting refers to interventions conducted both before ED discharge and after ED discharge.

Abbreviations: ED=emergency department; NR=not reported; MD=physician; RN=nurse; SW=social worker; PT=physical therapist; OT=occupational therapist.

## References

1. Basic D, Conforti DA. A prospective, randomised controlled trial of an aged care nurse intervention within the Emergency Department. *Aust Health Rev* 2005;29:51-9.
2. Caplan GA, Williams AJ, Daly B, Abraham K. A randomized, controlled trial of comprehensive geriatric assessment and multidisciplinary intervention after discharge of elderly from the emergency department--the DEED II study. *J Am Geriatr Soc* 2004;52:1417-23.
3. Gagnon AJ, Schein C, McVey L, Bergman H. Randomized controlled trial of nurse case management of frail older people. *J Am Geriatr Soc* 1999;47:1118-24.
4. Runciman P, Currie CT, Nicol M, Green L, McKay V. Discharge of elderly people from an accident and emergency department: evaluation of health visitor follow-up. *J Adv Nurs* 1996;24:711-8.
5. Eklund K, Wilhelmson K, Gustafsson H, Landahl S, Dahlin-Ivanoff S. One-year outcome of frailty indicators and activities of daily living following the randomised controlled trial: "Continuum of care for frail older people". *BMC Geriatr* 2013;13:76.
6. McCusker J, Verdon J, Tousignant P, de Courval LP, Dendukuri N, Belzile E. Rapid emergency department intervention for older people reduces risk of functional decline: results of a multicenter randomized trial. *J Am Geriatr Soc* 2001;49:1272-81.
7. Mion LC, Palmer RM, Meldon SW, et al. Case finding and referral model for emergency department elders: a randomized clinical trial. *Ann Emerg Med* 2003;41:57-68.
8. Biese K, Lamantia M, Shofer F, et al. A randomized trial exploring the effect of a telephone call follow-up on care plan compliance among older adults discharged home from the emergency department. *Acad Emerg Med* 2014;21:188-95.
9. Biese KJ, Busby-Whitehead J, Cai J, et al. Telephone follow-up for older adults discharged to home from the emergency department: a pragmatic randomized controlled trial. *J Am Geriatr Soc* 2018;66:452-8.
