# Supplementary material
Source: PubMed Central journal article supplement (PMC6677239)
Supplement: NIHMS1026504-supplement-Table_S7.pdf [file NIHMS1026504-supplement-Table_S7.pdf]

### Supplemental Table 7. Intervention characteristics of nonrandomized studies

Patient-focused intervention elements include comprehensive assessment and/or risk screening, patient and/or caregiver education and/or support, intervention (medication, rehabilitation). Provider or systems-focused intervention elements include planned follow-up communication or visit, referral to provider, specialist or community resource, continuity of care/care coordination, and changes to ED environment and/or procedures.

| Study                                     | Setting Intervention Target | # of Providers Type of Provider(s) Geriatrics Trained? | Patient-focused Intervention Components <sup>a</sup>                                                                                                                                                                                         | Provider- or System-directed Intervention Components <sup>a</sup>                                                                                                                                                                                            | Key Intervention Components Present                                                               | Mode # Planned Contacts |
|-------------------------------------------|-----------------------------|--------------------------------------------------------|----------------------------------------------------------------------------------------------------------------------------------------------------------------------------------------------------------------------------------------------|--------------------------------------------------------------------------------------------------------------------------------------------------------------------------------------------------------------------------------------------------------------|---------------------------------------------------------------------------------------------------|-------------------------|
| <b>Single-Strategy Interventions</b>      |                             |                                                        |                                                                                                                                                                                                                                              |                                                                                                                                                                                                                                                              |                                                                                                   |                         |
| <i>Discharge Planning</i>                 |                             |                                                        |                                                                                                                                                                                                                                              |                                                                                                                                                                                                                                                              |                                                                                                   |                         |
| Arendts, 2012 <sup>1</sup>                | Pre-ED discharge Patient    | Multiple providers SW, PT Yes                          | <ul style="list-style-type: none"> <li>• <b>Comprehensive functional assessment</b></li> <li>• <i>No education/support</i></li> <li>• <i>No medication review or rehabilitation intervention</i></li> </ul>                                  | <ul style="list-style-type: none"> <li>• <b>Interdisciplinary team meeting</b></li> <li>• <i>No follow-up</i></li> <li>• <i>No referral</i></li> </ul>                                                                                                       | <ul style="list-style-type: none"> <li>• Assessment</li> </ul>                                    | In-person 1             |
| Arendts, 2013 <sup>2</sup>                | Pre-ED Patient              | Multiple providers MD, RN, SW, PT Yes                  | <ul style="list-style-type: none"> <li>• <b>High-risk screening; comprehensive functional &amp; needs assessment</b></li> <li>• <i>No education/support</i></li> <li>• <i>No medication review or rehabilitation intervention</i></li> </ul> | <ul style="list-style-type: none"> <li>• <b>Referrals made (no details provided)</b></li> <li>• <i>No follow-up</i></li> <li>• <i>No continuity of care</i></li> </ul>                                                                                       | <ul style="list-style-type: none"> <li>• <b>Assessment</b></li> </ul>                             | In-person 1             |
| <i>Case Management/Transition of Care</i> |                             |                                                        |                                                                                                                                                                                                                                              |                                                                                                                                                                                                                                                              |                                                                                                   |                         |
| Pedersen, 2016 <sup>3</sup>               | Post-ED Patient             | Multiple providers MD, RN Yes                          | <ul style="list-style-type: none"> <li>• <b>Assessment part of routine ED care</b></li> <li>• <i>No education/support</i></li> <li>• <i>No medication review or rehabilitation intervention</i></li> </ul>                                   | <ul style="list-style-type: none"> <li>• <b>Home visit scheduled</b></li> <li>• <b>Patient-initiated follow-up communication</b></li> <li>• <b>Referrals to primary care provider, community services</b></li> <li>• <i>No continuity of care</i></li> </ul> | <ul style="list-style-type: none"> <li>• Assessment</li> <li>• Referral plus follow-up</li> </ul> | In-person 1             |

| Study                                                             | Setting Intervention Target                                 | # of Providers Type of Provider(s) Geriatrics Trained? | Patient-focused Intervention Components <sup>a</sup>                                                                                                                                                                              | Provider- or System-directed Intervention Components <sup>a</sup>                                                                                                                                    | Key Intervention Components Present                                                                  | Mode # Planned Contacts |
|-------------------------------------------------------------------|-------------------------------------------------------------|--------------------------------------------------------|-----------------------------------------------------------------------------------------------------------------------------------------------------------------------------------------------------------------------------------|------------------------------------------------------------------------------------------------------------------------------------------------------------------------------------------------------|------------------------------------------------------------------------------------------------------|-------------------------|
| <i>Medication Management</i>                                      |                                                             |                                                        |                                                                                                                                                                                                                                   |                                                                                                                                                                                                      |                                                                                                      |                         |
| Mortimer, 2011 <sup>4</sup>                                       | Pre-ED discharge Patient                                    | Single providers<br>NR<br>Yes                          | <ul style="list-style-type: none"> <li>• <b>Patient education</b></li> <li>• <b>Medication review &amp; reconciliation</b></li> <li>• <i>No assessment/ screening</i></li> <li>• <i>No rehabilitation intervention</i></li> </ul> | <ul style="list-style-type: none"> <li>• <b>Referrals to other health services</b></li> <li>• <i>No follow-up</i></li> <li>• <i>No continuity of care</i></li> </ul>                                 | <ul style="list-style-type: none"> <li>• No key intervention components present</li> </ul>           | In-person<br>NR         |
| <b>Multi-Strategy Interventions</b>                               |                                                             |                                                        |                                                                                                                                                                                                                                   |                                                                                                                                                                                                      |                                                                                                      |                         |
| <i>Discharge Planning PLUS Case Management/Transition of Care</i> |                                                             |                                                        |                                                                                                                                                                                                                                   |                                                                                                                                                                                                      |                                                                                                      |                         |
| Bond, 2014 <sup>5</sup>                                           | Pre-ED discharge Patient, caregiver                         | Single provider<br>RN<br>Yes                           | <ul style="list-style-type: none"> <li>• <b>Assessment performed by ED care coordinator</b></li> <li>• <b>Caregiver education &amp; support</b></li> <li>• <i>No medication review or rehabilitation intervention</i></li> </ul>  | <ul style="list-style-type: none"> <li>• <b>Referral to community services</b></li> <li>• <i>No follow-up</i></li> <li>• <i>No continuity of care</i></li> </ul>                                     | <ul style="list-style-type: none"> <li>• Assessment</li> </ul>                                       | In-person<br>NR         |
| Miller, 1996 <sup>6</sup>                                         | Before and after ED discharge (Bridge) <sup>b</sup> Patient | Multiple providers<br>MD, RN<br>Yes                    | <ul style="list-style-type: none"> <li>• <b>Caregiver support</b></li> <li>• <i>No assessment/ screening</i></li> <li>• <i>No medication review or rehabilitation intervention</i></li> </ul>                                     | <ul style="list-style-type: none"> <li>• <b>Follow-up communication/visit</b></li> <li>• <b>Referral to provider, community services</b></li> <li>• <b>Interdisciplinary team meeting</b></li> </ul> | <ul style="list-style-type: none"> <li>• Referral plus follow-up</li> <li>• Bridge design</li> </ul> | In-person<br>1          |

<sup>a</sup> Bolded text indicates intervention components that were present in the study. Italicized text indicates intervention components not present in the study.

<sup>b</sup> Bridge setting refers to interventions conducted both before ED discharge and after ED discharge.

Abbreviations: ED=emergency department; NR=not reported; MD=physician; RN=nurse; SW=social worker; PT=physical therapist; OT=occupational therapist

## References

1. Arendts G, Fitzhardinge S, Pronk K, Donaldson M, Hutton M, Nagree Y. The impact of early emergency department allied health intervention on admission rates in older people: a non-randomized clinical study. *BMC Geriatr* 2012;12:8.
2. Arendts G, Fitzhardinge S, Pronk K, Hutton M. Outcomes in older patients requiring comprehensive allied health care prior to discharge from the emergency department. *Emerg Med Australas* 2013;25:127-31.
3. Pedersen LH, Gregersen M, Barat I, Damsgaard EM. Early geriatric follow-up after discharge reduces readmissions – A quasi-randomised controlled trial. *Eur Geriatr Med* 2016;7:443-8.
4. Mortimer C, Emmerton L, Lum E. The impact of an aged care pharmacist in a department of emergency medicine. *J Eval Clin Pract* 2011;17:478-85.
5. Bond CM, Freiheit EA, Podruzny L, et al. The emergency to home project: impact of an emergency department care coordinator on hospital admission and emergency department utilization among seniors. *Int J Emerg Med* 2014;7:18.
6. Miller DK, Lewis LM, Nork MJ, Morley JE. Controlled trial of a geriatric case-finding and liaison service in an emergency department. *J Am Geriatr Soc* 1996;44:513-20.
